1 **Near-native state imaging by cryo-soft-X-ray tomography reveals remodelling of cytoplasmic**  
2 **vesicles and mitochondria during HSV-1 infection**

3

4 Kamal L. Nahas<sup>1,2</sup>, Viv Connor<sup>1</sup>, Maria Harkiolaki<sup>2\*</sup>, Colin M. Crump<sup>1\*</sup>, Stephen C. Graham<sup>1\*</sup>

5 <sup>1</sup>Department of Pathology, University of Cambridge, Tennis Court Road, Cambridge CB2 1QP, United  
6 Kingdom.

7 <sup>2</sup>Beamline B24, Diamond Light Source, Harwell Science and Innovation Campus, Didcot OX11 0DE,  
8 United Kingdom.

9 \*Corresponding authors: Maria Harkiolaki, [maria.harkiolaki@diamond.ac.uk](mailto:maria.harkiolaki@diamond.ac.uk); Colin M. Crump,  
10 [cmc56@cam.ac.uk](mailto:cmc56@cam.ac.uk); Stephen C. Graham, [scg34@cam.ac.uk](mailto:scg34@cam.ac.uk)

11 **ORCIDs:** KLN 0000-0003-3501-8473; CMC 0000-0001-9918-9998; SCG 0000-0003-4547-4034; MH  
12 0000-0001-8091-9057

13 **Contributions:** Conceptualization: MH, CMC, SCG; Data Curation: KLN; Funding Acquisition: MH,  
14 CMC, SCG; Investigation: KLN, VC, CMC, SCG; Project Administration: MH, CMC, SCG; Resources:  
15 MH; Software: KLN; Supervision: MH, CMC, SCG; Visualization: KLN; Writing – Original Draft  
16 Preparation: KLN, CMC, SCG; Writing – Review & Editing: KLN, MH, CMC, SCG

17 **Short Title:** Cryo-soft-X-ray tomography of HSV-1 infection

18 **Keywords:** Herpesvirus, virus:host interactions, cryoSXT

19

20 **Abstract**

21 Herpes simplex virus-1 (HSV-1) is a large, enveloped DNA virus and its assembly in the cell is a  
22 complex multi-step process during which viral particles interact with numerous cellular compartments  
23 such as the nucleus and organelles of the secretory pathway. Transmission electron microscopy and  
24 fluorescence microscopy are commonly used to study HSV-1 infection. However, 2D imaging limits our  
25 understanding of the 3D geometric changes to cellular compartments that accompany infection and  
26 sample processing can introduce morphological artefacts that complicate interpretation. In this study,  
27 we used a 3D imaging technique (soft X-ray tomography) to observe differences in whole-cell  
28 architecture between HSV-1 infected and uninfected cells. To protect the near-native structure of  
29 cellular compartments, we used a non-disruptive sample preparation technique involving rapid  
30 cryopreservation. We observed viral capsids and assembly intermediates interacting with nuclear and  
31 cytoplasmic membranes. Furthermore, we observed differences in the morphology of specific  
32 organelles between uninfected and infected cells. The local concentration of cytoplasmic vesicles at  
33 the juxtannuclear compartment increased and their mean width decreased as infection proceeded.  
34 Furthermore, mitochondria in infected cells were elongated and highly branched, suggesting that  
35 altered dynamics of mitochondrial fission/fusion accompany HSV-1 infection. Our results demonstrate  
36 that high-resolution 3D images of cellular compartments can be captured in a near-native state using  
37 soft X-ray tomography and have revealed that infection causes striking changes to the morphology of  
38 intracellular organelles.

39

40

41 **Importance**

42 Ultrastructural changes to the morphology and organization of cellular compartments during herpes  
43 simplex virus-1 (HSV-1) infection have not been studied under near-physiological conditions. In this  
44 study, near-native state X-ray imaging was used to image the ultrastructure of HSV-1 and cellular  
45 compartments during infection, identifying striking changes to the abundance and organization of  
46 cytoplasmic vesicles and mitochondria. The concentration of vesicles in the juxtannuclear region  
47 increased with time post infection, which could represent an increasing supply of vesicles to support  
48 capsid envelopment. Mitochondria are dynamic cellular compartments that undergo fusion to share  
49 resources and fission followed by mitophagy to recycle damaged components. Here we show that  
50 mitochondria tend to elongate and form highly-branched networks as infection progresses, suggesting  
51 fusion predominates over fission during HSV-1 infection. These findings offer insight into stages of virion  
52 morphogenesis and the cellular response to infection.

53

54

## 55 Introduction

56 Herpes simplex virus-1 (HSV-1) is a large, enveloped DNA virus in the *Alphaherpesvirinae* subfamily  
57 of *Herpesviridae* that establishes a persistent life-long latent infection in sensory and sympathetic  
58 neurons, occasionally reactivating to cause lytic replication in oral or genital mucosal epithelial cells that  
59 culminates in cold sores and genital herpes, respectively<sup>1</sup>. The production of viral particles during lytic  
60 replication is a complex process involving multiple cellular compartments<sup>2-6</sup>.

61 In the first step of virion morphogenesis, capsid assembly and genome packaging occur in the nucleus<sup>7</sup>.  
62 Fully formed nucleocapsids must cross the nuclear envelope to migrate into the cytoplasm and undergo  
63 latter stages of virus assembly – a process which involves close interaction between nucleocapsids and  
64 the membranes of the nuclear envelope. Unlike individual proteins, the nucleocapsids are too large to  
65 pass through nuclear pores and must therefore first bud into the perinuclear space through the inner-  
66 nuclear membrane, forming a perinuclear viral particle (primary envelopment). The envelope of this  
67 particle subsequently fuses with the outer-nuclear membrane to release the nucleocapsid into the  
68 cytoplasm (de-envelopment)<sup>8-11</sup>. Numerous copies of multiple ( $\geq 23$ ) viral proteins deposit on the  
69 surface of nucleocapsids in the nucleus and cytoplasm to form an amorphous proteinaceous layer  
70 known as the tegument<sup>12</sup>. Tegument proteins have multiple important roles during infection, including  
71 the promotion of virion maturation<sup>2,3,6</sup>. Several cytoplasmic compartments are essential to virion  
72 morphogenesis: viral proteins are synthesized and modified in the endoplasmic reticulum and Golgi  
73 complex and, in a process known as secondary envelopment, nucleocapsids acquire their membrane  
74 envelope from cytoplasmic vesicles that are thought to be derived from the *trans*-Golgi network and the  
75 endosomal system<sup>2,3,13</sup>. In addition to compartments directly involved in virion assembly, the  
76 cytoskeleton and other cellular organelles, such as mitochondria and lysosomes, can become  
77 remodelled in response to infection<sup>14-16</sup>. Understanding how the morphology and organization of cellular  
78 compartments change during infection could illuminate their involvement in virion morphogenesis and  
79 in the cellular response to HSV-1 infection.

80 Previous studies to characterize remodelling of cellular compartments have identified numerous  
81 changes that accompany HSV-1 infection, including the fragmentation of the Golgi complex and the  
82 condensation of the endoplasmic reticulum around the nuclear rim<sup>17,18</sup>. A more comprehensive study  
83 has recently been carried out using a recombinant form of HSV-1, known as the “timestamp” reporter

84 virus, expressing fluorescent chimeras of the early protein ICP0 and the late protein gC to distinguish  
85 between early and late stages of infection<sup>16</sup>. Eight cellular compartments were compared between  
86 uninfected and timestamp virus-infected human TERT-immortalized human foreskin fibroblast (HFF-  
87 hTERT) cells, with high-resolution spatial data collected using structured illumination microscopy (SIM)  
88 and expansion microscopy. Numerous changes in the morphology of cellular compartments were  
89 observed as infection progressed, such as fragmentation of the Golgi complex at late stages of infection,  
90 concentration of endosomes and lysosomes at a juxtannuclear compartment, and elongation of  
91 mitochondria<sup>16</sup>. However, the extent to which sample preparation strategies may damage the  
92 morphology of cellular structures remains poorly understood and it is possible that disruptive techniques  
93 such as immunostaining or sample expansion could introduce artefacts in cellular ultrastructure<sup>19–21</sup>.  
94 Moreover, it is not clear if these changes to cellular compartments are consistent across different cell  
95 types used to study HSV-1 infection.

96 In this study, we investigated changes to cellular compartments during infection with the HSV-1  
97 timestamp reporter virus using soft X-ray tomography of cryopreserved samples (cryoSXT). Soft X-rays  
98 used for this analysis have a lower energy (~500 eV)<sup>22</sup> and longer wavelength than the “hard” X rays  
99 typically used for medical imaging (~15–30 keV)<sup>23</sup> or X-ray crystallography (~6–20 keV)<sup>24</sup>. The  
100 wavelengths of soft X-rays used for cryoSXT are in the “water window” where structured carbon-rich  
101 structures in the cell such as membranes produce considerable contrast whereas oxygen-rich  
102 structures such as the “watery” cytosol remain transparent, thereby enabling cellular compartments to  
103 be observed<sup>22</sup>. We used this label-free technique to image the ultrastructure of infected (and control)  
104 cells, monitoring the 3D geometry and organization of cellular compartments<sup>25</sup>. The ultrastructure of the  
105 samples was protected in a near-native state using a non-disruptive cryopreservation protocol<sup>26</sup>. Our  
106 study focused on the ultrastructural changes that accompany HSV-1 infection of human osteosarcoma  
107 U2OS cells, allowing comparison with previous reports from infection of HFF-hTERT cells<sup>16</sup>. Although  
108 a few differences were observed between the extent of Golgi fragmentation and the subcellular  
109 distribution of ICP0, we determined that remodelling of cytoplasmic vesicles and mitochondria was  
110 largely similar between these cultured cells. Furthermore, the high resolution afforded by cryoSXT  
111 revealed that mitochondria become highly branched during HSV-1 infection.

112

## 113 Results

### 114 *HSV-1 viral particles and assembly intermediates are detectable by cryoSXT*

115 While cryoSXT has been used to image virus particles in infected cells<sup>25,27</sup>, it was unclear whether  
116 'naked' HSV-1 capsids, which are approximately 125 nm in diameter<sup>28,29</sup>, would be large enough and  
117 offer sufficient contrast to be observed with this imaging method. To establish a baseline, we grew  
118 uninfected HFF-hTERT cells on holey-carbon electron microscopy (EM) grids and plunge cryocooled  
119 them for imaging by cryoSXT. Unlike a glass lens that focuses light by refraction, a zone plate was used  
120 to focus the X rays by diffraction: a zone plate is a diffraction grating composed of a series of concentric  
121 rings in which alternating rings are transparent to X rays and the resolution is determined by the  
122 diameter of the outermost ring<sup>30</sup>. 25 nm zone plates, affording up to 30 nm resolution, were used for  
123 our experiments here. To produce a tomogram, a series of X-ray projection images were collected from  
124 a single 9.46×9.46 μm field of view in the cell, with each projection collected following rotation of the  
125 specimen around an axis normal to the incident X-ray beam (tilt series). For each tomogram the  
126 projections spanned up to 120° of rotation with increments of 0.2° or 0.5° per image. To correct for  
127 vibrations in the microscope during imaging, the projections in the series were aligned together in the  
128 program IMOD<sup>31</sup> using gold fiducials or lipid droplets as landmarks for registration. We collected 19 tilt  
129 series that were processed into 3D tomograms and we found that the content of nuclei in uninfected  
130 cells appear relatively featureless (**Fig 1A**).

131 Given that the nucleus is the site of capsid assembly, we sought to determine whether an abundance  
132 of capsids could be detected in infected cells. To this end, HFF-hTERT cells were cultured on holey-  
133 carbon EM grids, infected with 2 plaque-forming units (PFU) per cell of HSV-1 and plunge frozen at 16  
134 hours post-infection (hpi). Infected cells were imaged via cryoSXT using a 40 nm zone plate objective  
135 (**Fig. 1B**), illuminating a 15.14×15.14 μm field of view, using the image acquisition and analysis workflow  
136 detailed above. These samples were prepared and cryopreserved on three different occasions and 98  
137 tomograms were collected in total. Numerous dark puncta were observed in the nucleus of infected  
138 cells (**Fig. 1C**). We interpreted these puncta to be HSV-1 capsids because capsids are rich in carbon  
139 and phosphorous, being proteinaceous shells surrounding tightly packed DNA genomes, and these  
140 elements exhibit strong absorption at the 500 eV X-ray energy used here for imaging<sup>22</sup>. During virus  
141 assembly, capsids enter the perinuclear space by budding at the inner nuclear membrane (primary

142 envelopment), forming a membrane-wrapped perinuclear viral particle that rapidly fuses with the outer  
143 nuclear membrane *en route* to the cytoplasm<sup>9</sup>. These enveloped virions in the perinuclear space are  
144 infrequently observed by EM because they are short-lived and the thin sectioning required for imaging  
145 using electron light decreases the probability that such structures will be present within the cellular  
146 volume being examined. The high penetrating power of soft X-rays in unstained cryopreserved samples  
147 (> 10  $\mu\text{m}$ ) removes the requirement for sectioning, allowing the entire depth of the cell to be imaged  
148 simultaneously for any given field of view. This increases the likelihood of observing short-lived  
149 structures such as primary enveloped viral particles. Dark puncta within the nuclear envelope that are  
150 likely to be perinuclear viral particles were found 11 times in 98 tomograms (**Fig. 1D**). The perinuclear  
151 viral particles appear to expand the perinuclear space and distend the nuclear envelope, as shown in  
152 a segmented image (**Fig. 1E**). The width of the nuclear envelope at putative sites of primary  
153 envelopment ( $190.6 \pm 6.01$  nm SEM; N=11) is significantly greater than the width of the nuclear  
154 envelope in other places on the same tomograms ( $99.8 \pm 3.57$  nm SEM; N=11; paired t-test p-  
155 value= $1.93 \times 10^{-9}$ ) (**Fig. 1F**). This demonstrates the substantial deformation of the nuclear envelope that  
156 must occur to accommodate perinuclear viral particles. Viral capsids were also observed in the  
157 cytoplasm in close proximity to vesicles that are likely sites of secondary envelopment (**Fig. 1G**). After  
158 secretion, HSV-1 particles commonly remain bound to the cell surface, a property that may be  
159 exacerbated by the antiviral restriction factor tetherin<sup>32,33</sup>. In addition, we expected to see HSV-1  
160 particles between cells because virions are targeted to cell junctions to promote cell-cell spread<sup>34</sup>.  
161 Linear arrays of dark puncta were observed on the cell surface and between cells (**Fig. 1H & I**) and  
162 likely represent released virus particles (extracellular virions). Virus particles accumulate most of their  
163 tegument in the cytoplasm and become enveloped before they are released from the cell. We measured  
164 the width of nuclear capsids and extracellular virions from 8 tomograms to determine if they could be  
165 distinguished based on their size (**Fig. 1J**). Nuclear capsids had a width of  $125.8 \pm 1.70$  nm SEM (n=80  
166 from 4 tomograms; range 96–160 nm; SD 15.22 nm), which is consistent with high-resolution structural  
167 analysis of purified capsids<sup>29</sup> (~125 nm) and of capsids inside infected-cell nuclei<sup>35</sup>. Extracellular virions  
168 were larger with a width of  $198.6 \pm 3.48$  nm SEM (n=80 from 4 tomograms; range 128–272 nm; SD  
169 31.15 nm), consistent with previous reports (~175-200 nm<sup>28,36</sup>). These differences were found to be  
170 significant with a Wilcoxon test for unequal variance ( $W=126$ ,  $p\text{-value} < 2.2 \times 10^{-16}$ ).

171 *Early protein ICP0 and late protein gC have different patterns of spatiotemporal expression in HFF-*  
172 *hTERT and U2OS cells*

173 Recent microscopy and single-cell transcriptomics studies have revealed that, even in a monolayer of  
174 cultured cells synchronously infected with HSV-1, individual cells progress through the infection cycle  
175 at different rates and the remodelling of cellular compartments varies depending on the stage of  
176 infection<sup>16,37</sup>. To control for this, a recombinant strain of HSV-1 termed the timestamp virus has been  
177 developed to allow identification of the stage of infection based on the abundance and subcellular  
178 localization of the fluorescently tagged early and late viral proteins, ICP0 and gC respectively<sup>16</sup>.  
179 Fluorescence microscopy of HFF-hTERT cells infected with this timestamp virus allowed  
180 characterization of the changes to cellular compartments that accompany progressing HSV-1 infection  
181 and categorization of cells into 4 stages of infection. Having confirmed that virus particles could be  
182 observed in infected HFF-hTERT cells using a 40 nm zone plate objective, we sought to obtain higher-  
183 resolution information on the morphological changes exhibited by timestamp HSV-1-infected cells over  
184 the course of infection by cryoSXT imaging using a 25 nm zone plate objective. However, preliminary  
185 experiments performed using infected HFF-hTERT cells were unsuccessful as the infected cells proved  
186 sensitive to higher flux density of the resultant X-ray beam, leading to localized sample heating and  
187 low-quality tomograms. We therefore turned to U2OS osteosarcoma cells, which have been shown to  
188 produce consistently high-quality tomograms when imaged by cryoSXT<sup>25,26</sup> and have been used  
189 previously for HSV-1 ultrastructural analysis<sup>38,39</sup>.

190 To compare the temporal profiles of progression of timestamp HSV-1 infection in HFF-hTERT and  
191 U2OS cells, we first compared the expression patterns of these proteins between the two cell types.  
192 Cells were infected at a multiplicity of infection (MOI) of 1 and 3 and samples were fixed at multiple time  
193 points following infection before imaging on a widefield fluorescence microscope (**Fig. 2**). The  
194 immediate early HSV-1 protein ICP0 was used to characterize early stages of infection because it is  
195 one of the first viral proteins to be expressed<sup>40</sup>. In both cell lines, eYFP-ICP0 was expressed in all four  
196 stages and its localization was restricted to the nucleus in stage 1. However, the spatial localization of  
197 eYFP-ICP0 differed between HFF-hTERT and U2OS cells in stages 2-4: in these stages of HFF-hTERT  
198 cell infection, eYFP-ICP0 signal was observed to diminish in the nucleus and continue to increase in  
199 the cytoplasm across these three stages, whereas greater retention of eYFP-ICP0 in the nucleus was



200 observed in U2OS cells throughout the entire course of infection (**Fig. 2A**). This may reflect differences  
201 in cellular interactions for ICP0 in U2OS cells, which is consistent with previous observations  
202 demonstrating that replication deficits demonstrated by ICP0-null strains of HSV-1 in human fibroblasts  
203 are effectively complemented in U2OS cells<sup>41</sup>. Unlike eYFP-ICP0, the spatial expression of gC-mCherry  
204 was similar between HFF-hTERT and U2OS cells. gC is a viral glycoprotein expressed at late stages  
205 of virus replication<sup>42</sup> that is incorporated into nascent virus particles at sites of virus envelopment<sup>43</sup>. In  
206 both cell types gC-mCherry was enriched at a juxtannuclear site in stage 3 but became dispersed  
207 throughout the cytoplasm and at the plasma membrane by stage 4 (**Fig. 2A**).

208 Next, we probed whether progression through the replication cycle follows the same timecourse in HFF-  
209 hTERT and U2OS cells by infecting with different MOIs and imaging at different times post-infection to  
210 compare the proportion of infected cells at each stage of infection. Although the spatial expression of  
211 gC-mCherry was similar, fewer U2OS cells transitioned between stages 3 and 4 compared to HFF-  
212 hTERT cells at MOI 1 and 3, even by the 24-hour timepoint (**Fig. 2B**). Stage 4 is defined by the dispersal  
213 of gC-mCherry throughout the cytoplasm and, given the colocalization of gC with Golgi markers 58K  
214 protein and beta-1,4-galactosyltransferase 1, this dispersal is thought to arise via fragmentation of the  
215 Golgi complex<sup>16</sup>. The reduced number of U2OS cells in stage 4 may suggest a delay in, or resistance  
216 to, Golgi complex fragmentation. The partial cytoplasmic translocation of eYFP-ICP0 and the reduced  
217 gC-mCherry dispersal complicated the distinction between stages 1 and 2, and between stages 3 and  
218 4, respectively. As a result, we combined the stages into two broader early (1+2) and late (3+4) stages  
219 in our study.

#### 220 *Vesicles proliferate and mitochondria become elongated and branched during HSV-1 infection.*

221 To characterize the changes in morphology of cellular compartments that accompany different stages  
222 of virus infection, U2OS cells were grown on holey-carbon EM grids before being infected (or mock  
223 infected) with timestamp HSV-1 and cryogenically preserved by plunge freezing in liquid nitrogen-  
224 cooled liquid ethane (**Fig. 3A**). Vitrified samples were analyzed by cryo-wide-field microscopy to classify  
225 the stage of infection and then imaged using cryoSXT to correlate the stage of virus infection in a  
226 specific cell with observed morphological changes (**Fig. 3B**). As the proportion of U2OS cells in the  
227 early stages of infection (stages 1+2) was consistently lower than the proportion in late stages of

228 infection (stages 3+4; **Fig. 2B**), grids were infected at MOI 1 and plunge frozen at 9 hpi to achieve a  
229 more balanced proportion of cells in early and late stages of infection.

230 In total, 139 SXT tomograms were reconstructed; 76 from uninfected cells alongside 22 and 41 from  
231 cells at early- or late-stages of infection, respectively, across three independent replicates (**Table 1**).  
232 Manual inspection of the resultant tomograms revealed that the 25 nm zone plate allows detection of  
233 higher resolution features than is possible with the 40 nm zone plate, such as the lumen of the  
234 endoplasmic reticulum, cytoskeletal filaments, and small membrane structures (**Supp. Fig. 1A-E**). The  
235 observed width of nuclear capsids is very similar in infected HFF-hTERT cells imaged using the 40 nm  
236 zone plate (**Fig. 1J**) or U2OS cells imaged using the 25 nm zone plate (**Supp. Fig. 1F**). The tomograms  
237 collected from U2OS cells using the 25 nm zone plate were thus deemed suitable for identifying  
238 changes to cellular compartments that occur during HSV-1 infection.

239 We observed that the HSV-1 infection does not affect the morphology of cellular compartments such  
240 as the nucleus and lipid droplets. Despite the continuous budding and fusion of capsids at the inner and  
241 outer nuclear membranes, we did not observe any obvious changes to the integrity of the nuclear  
242 envelope. We occasionally observed bulging of the nuclear envelope into the cytoplasm (**Supp. Fig.**  
243 **1G**) but this could be seen in both uninfected and infected cells. The size and abundance of lipid  
244 droplets did not appear to differ between uninfected, cells and those at early- or late-stages of infection.  
245 However, striking changes were observed in the size and dispersal of vesicles, and in the length and  
246 connectivity of the mitochondrial network, between uninfected and infected cells, with the changes  
247 becoming more pronounced in cells at late stages of infection (**Fig. 4&5 and Supp. Video 1**).

248 HSV-1 capsids are thought to interact with several types of vesicles in the cytoplasm, including *trans*-  
249 Golgi network vesicles and endosomes, both of which have been implicated in secondary  
250 envelopment<sup>13</sup>. There was a striking difference in the concentration of vesicles at the juxtannuclear  
251 compartment between uninfected and infected cells (**Fig. 4A and Supp. Video 2**). Infected cells had a  
252 greater number of vesicles in juxtannuclear regions than uninfected cells. To determine if there was a  
253 difference in the size of vesicles between uninfected cells and those at early- or late-stages of infection  
254 we developed *Contour*, a program to segment and quantitate cellular features in 3D volumes  
255 (manuscript in preparation). The widest point of each vesicle in three dimensions from 4 tomograms for  
256 each condition was measured (**Fig. 4B**). The mean vesicle width was higher for uninfected cells (802.23

257  $\pm 348.47$  nm SD, N=96) than for early-stage ( $688.66 \pm 271.76$  nm SD, N=184) and late-stage ( $631.85$   
258  $\pm 270.60$  nm SD, N=184) infected cells. The mean vesicle widths for each tomogram were compared  
259 using a one-way ANOVA and Tukey test and the vesicle widths of uninfected cells were found to be  
260 significantly different from early-stage ( $p=0.04$ ) and late-stage ( $p=0.01$ ) infected cells. The vesicle width  
261 did not differ significantly between early-stage and late-stage infected cells ( $p=0.62$ ).

262 Mitochondria were the most phenotypically diverse organelles monitored in this study. In most cases,  
263 they were thin and possessed a dark matrix (**Fig. 5A**). However, occasionally there were cells that  
264 contained swollen mitochondria with a lighter matrix with highly contrasting cristae (**Supp. Fig. 2A**),  
265 similar to observations of mitochondria made by EM<sup>44–46</sup>. This swollen morphology is associated with  
266 release of cytochrome *c* from porous mitochondria during apoptosis<sup>44</sup>. Mitochondria are known to  
267 interact with lipid droplets, for example to acquire fatty acids for respiration<sup>47</sup>. Interestingly, we observed  
268 that lipid droplets were less frequently in close apposition to swollen mitochondria than to mitochondria  
269 possessing dark matrices (**Supp. Fig. 2B**). Swollen mitochondria were observed in each of the three  
270 independent sets of cell growth, infection and plunge freezing experiments performed, but these swollen  
271 mitochondria were most prevalent in the uninfected cells of replicate 3 (**Supp. Fig. 2C**). In uninfected  
272 cells, non-swollen mitochondria were heterogeneous in shape, with numerous being small and  
273 spherical or long and curved in the same cell. We observed branching in some elongated mitochondria.  
274 However, mitochondria appeared less heterogeneous in shape in infected cells, and were consistently  
275 more elongated and branched (**Fig. 5B and C, Supp. Fig. 2D, and Supp. Video 3**), in line with previous  
276 observations made using super-resolution fluorescence microscopy of HFF-hTERT cells infected with  
277 the timestamp virus<sup>16</sup>. Segmentation of mitochondria using *Contour* demonstrated that the number of  
278 points where mitochondria branch into two or more arms (branching nodes) was significantly increased  
279 in cells at late stages of infection ( $20.5 \pm 5.45$  nodes SD;  $n = 15$ ) compared to uninfected cells ( $7.0 \pm$   
280  $4.02$  nodes SD;  $n = 15$ ) (**Fig. 5C**). In some cases, the mitochondria fused into a single, branched  
281 network (**Fig. 5A and Supp. Video 3**), providing a dramatic demonstration of the increase in  
282 mitochondrial branching and decrease in number of distinct mitochondrial networks that accompanies  
283 HSV-1 infection. It was also observed that the number of distinct mitochondria decreased in infected  
284 cells, although ambiguity regarding the connectivity of mitochondrial networks that extend beyond the  
285 tomogram field-of-view prevented precise quantitation of this effect.

## 286 Discussion

287 In this study, we used cryoSXT to monitor the production of nascent HSV-1 particles and observe  
288 changes in the architecture of cellular compartments during infection. The penetrating power of X-rays  
289 facilitates cryoSXT imaging throughout the depth of the cell, allowing rare or transient events to be  
290 captured such as the transit of nascent capsids through the nuclear envelope. Furthermore, the lack of  
291 requirement for contrast-enhancing agents or chemical fixation allows direct imaging of cellular  
292 compartments in a near-native state. We exploited these properties of cryoSXT to compare the  
293 morphology of cellular compartments between uninfected and infected U2OS cells, using a recombinant  
294 strain of HSV-1 expressing fluorescently tagged early and late viral proteins to identify the infection  
295 stage of individual cells within the infected population.

296 HFF-hTERT and U2OS cells are commonly used for the study of HSV-1 infection<sup>16,38,39</sup>. We had  
297 intended to use HFF-hTERT cells for this study, to allow comparison with super-resolution fluorescence  
298 microscopy studies<sup>16</sup>, but found infected HFF-hTERT cells to be less amenable to interrogation by  
299 cryoSXT. We therefore explored the differences in the dynamics of viral infection between HFF-hTERT  
300 and U2OS cells using the timestamp virus. In general, the modifications to cellular compartments  
301 observed in this study largely replicated those observed in HFF-hTERT cells<sup>16</sup>, suggesting the  
302 interactions between viral components and cellular compartments are broadly similar in these two cell  
303 types. We observed subtle differences between the infections in these cells, including a U2OS-specific  
304 reduction in the dispersion of gC-containing membranes and a change in the nuclear-to-cytoplasmic  
305 translocation of the early viral protein ICP0 (**Fig. 2**). Residues important for the nuclear import/export  
306 dynamics of ICP0 have previously been identified: ICP0 possesses a canonical nuclear localization  
307 signal at residues 500–506 and deletion of 57 residues from the C terminus abolishes nuclear export  
308 of ICP0<sup>48</sup>. Although residues important for trafficking of ICP0 have been mapped, the cellular proteins  
309 involved in ICP0 trafficking have yet to be identified. In this study, a higher intensity of eYFP-ICP0 was  
310 detected in the nucleus compared with the cytoplasm of infected U2OS cells at every timepoint. In  
311 contrast, higher cytoplasmic intensity of ICP0 is observed at late stages of infection in HFF-hTERT cells  
312 and other cell lines<sup>16,49,50</sup>. This suggests that the expression of host proteins that regulate nuclear import  
313 and/or export of ICP0 may differ in U2OS cells. Several host proteins have been identified to participate  
314 in the nuclear trafficking of EPO, the pseudorabies virus orthologue of ICP0: Ran, Importin  $\alpha 1$ ,  $\alpha 3$ ,  $\alpha 7$ ,

315  $\beta$ 1, and transportin-1<sup>51</sup>. Future work is required to identify whether U2OS cells are depleted or enriched  
316 in proteins involved in nuclear import/export of ICP0, which may illuminate the mechanisms regulating  
317 subcellular localisation of this important viral E3 ligase during infection.

318 Compared with uninfected U2OS cells, infected cells had a greater local concentration of detectable  
319 vesicles in the juxtannuclear space (Figure 4), consistent with previous research into the distribution of  
320 vesicles during HSV-1 infection. For instance, early endosomes and lysosomes have been shown to  
321 accumulate at the juxtannuclear region during infection<sup>16</sup>. This reorganization of vesicle distribution may  
322 be related to a change in microtubule dynamics during infection. Previous studies have shown that  $\gamma$ -  
323 tubulin and pericentrin, which are components of the microtubule-organizing centre (MTOC), become  
324 dispersed during infection, suggesting breakdown of the MTOC<sup>52</sup>. Thereafter microtubules polymerize  
325 at multiple foci in the cytoplasm rather than at a single site and the growth rate, length, and stability of  
326 nascent microtubules become reduced compared with uninfected cells<sup>52</sup>. As the morphology of  
327 microtubules changes, the transport of vesicles towards the cell periphery may be obstructed, resulting  
328 in the accumulation of vesicles in juxtannuclear regions that may partly explain the increased local  
329 concentration of vesicles. An additional source of new vesicles may arise from the fragmentation of the  
330 Golgi complex during HSV-1 infection<sup>53</sup>. Most of the evidence for Golgi fragmentation is based on the  
331 dispersion of several Golgi markers ( $\beta$ -COP, Giantin, GM130, 58K protein, and beta-1,4-  
332 galactosyltransferase 1) throughout the cytoplasm during HSV-1 infection as assessed by fluorescence  
333 microscopy<sup>16,17,53</sup>. Golgi fragmentation has been studied to a lesser extent by ultrathin section EM,  
334 revealing cisternae become swollen and separated during infection<sup>17</sup>. Golgi fragmentation is thought to  
335 be a consequence of disrupted microtubule dynamics and can be induced by treatment with  
336 nocodazole, an inhibitor of  $\beta$ -tubulin polymerization<sup>53</sup>. Although our results are consistent with these  
337 observations, the lack of markers for different types of vesicles meant that we could not determine if  
338 the vesicles we observed with SXT were Golgi-derived, of endosomal origin, or were unrelated to these  
339 cellular compartments. We observed a reduction in the mean size of vesicles as the infection  
340 progressed (Figure 4B), which could arise either from fragmentation of the Golgi complex into small  
341 vesicles or an inability of small vesicles to be trafficked from the juxtannuclear region to their target  
342 organelles via microtubule transport. Future work could focus on the use of fluorescent markers and

343 correlative cryoSIM and cryoSXT imaging to identify which cellular compartments are found with an  
344 increased concentration at the juxtannuclear region<sup>25,54</sup>.

345 The spatial resolution afforded by cryoSXT allowed us to easily distinguish individual mitochondria in  
346 uninfected and infected U2OS cells. Consistent with previous studies of infected HFF-hTERT cells<sup>16</sup>,  
347 we observed that mitochondria became more elongated and branched as infection progresses and form  
348 extensive networks in some cases (Figure 5). Branching of mitochondria can either occur via *de novo*  
349 synthesis or by fusion of mitochondria<sup>55,56</sup>. Our observation that some cells at late stages of infection  
350 contain just one single large network of mitochondria, rather than numerous highly branched but  
351 disconnected mitochondrial networks, is consistent with fusion predominating over fission as a driver of  
352 mitochondrial network formation.

353 There are several possible explanations for the change in mitochondrial morphology observed during  
354 HSV-1 infection. Mitochondrial movement tends to occur along microtubules and this movement  
355 influences mitochondrial fusion/fission dynamics. Fission can arise from divergent movement of  
356 mitochondrial extensions along microtubules and fusion is supported by convergent movement of  
357 mitochondria<sup>57</sup>. Nocodazole treatment to depolymerize microtubules blocks transport, fusion and fission  
358 of mitochondria, and there is evidence that thin microtubule extensions develop when fission is  
359 obstructed<sup>58</sup>. It is possible that fission of existing mitochondrial networks may be obstructed when  
360 microtubules depolymerize during HSV-1 infection, and this may prevent the generation of small  
361 mitochondria. Such changes to the microtubule network begin at 6 hpi and would thus be expected to  
362 have a greater influence on mitochondrial morphology in the late stages of infection<sup>52</sup>, consistent with  
363 our observations. Alternatively, the morphological changes to mitochondria may reflect a cellular  
364 response to increased respiratory demand<sup>59</sup>. An increase in ATP production can be achieved by  
365 mitochondrial elongation, for example under conditions of stress such as hypoxia and starvation of  
366 glucose metabolism<sup>60,61</sup>. An increase in respiration, including oxidative phosphorylation, has been  
367 observed for the related herpesvirus human cytomegalovirus<sup>62</sup>. The increased number of elongated  
368 mitochondria in cells at late stages of infection could facilitate an increase in ATP production during  
369 infection. Increased oxidative stress provides a third plausible explanation for the observed changes in  
370 mitochondrial morphology. Increased production of reactive oxygen species (ROS) during respiration  
371 appears to be a common feature of viral infection that has been observed for hepatitis C virus,

372 respiratory syncytial virus and the herpesvirus Epstein-Barr virus<sup>63–65</sup>. One mechanism by which the  
373 cell responds to oxidative stress is by fusion of undamaged and ROS-damaged mitochondria to allow  
374 for compensatory effects by sharing resources needed for ATP production<sup>56</sup>. It is possible that the  
375 increased fusion events we observed may have arisen in response to increased oxidative stress during  
376 infection.

377 Although a change in energy metabolism may reflect a generalized response by the cell to infection,  
378 several HSV-1 proteins have been reported to localize at mitochondria (pUL7, pUL16, pUS3,  
379 pUL12.5), suggesting that HSV-1 directly modulates mitochondrial activity<sup>66–69</sup>. pUS3 inhibits the  
380 activity of electron transport chain complexes II and III as early as 6 hpi<sup>67</sup> and pUL12.5 functions in  
381 the depletion of mitochondrial DNA and downregulation of mitochondrial proteins, including ND6 and  
382 COX2, as early as 4–8 hpi<sup>68</sup>. The functional consequences of pUL16 binding mitochondria are not  
383 well characterized, although we note that a pUL16 mutant co-localized with mitochondrial fission  
384 sites<sup>69</sup>. The precise mechanisms by which HSV-1 alters the architecture of mitochondria and the role  
385 of specific viral proteins, versus virus-induced metabolic strain, thus remains unclear. Combining  
386 metabolic profiling of infected cells with ultrastructural analysis of mitochondrial morphology, using  
387 wild-type and mutant (knock-out) viruses, will help illuminate the factors that drive the dramatic  
388 remodelling of mitochondria observed during HSV-1 infection and the functional consequences  
389 thereof.

390 In conclusion, cryoSXT allows the detection HSV-1 capsids and virions in different subcellular locations,  
391 such as the nucleus, perinuclear space, cytoplasmic vesicles, and cell surface. Use of the timestamp  
392 HSV-1 reporter virus facilitated identification of individual cells at early or late stages of infection, and  
393 we observed accumulation of vesicles at juxtannuclear assembly compartments plus the elongation and  
394 branching of mitochondria in infected cells as infection progresses. The ability of cryoSXT to image the  
395 entire depth of infected cells in a near-native state, with minimal sample processing, highlights its utility  
396 as a tool for 3D imaging to identify changes in cellular architecture that accompany virus infection.

397

398

## 399 **Materials & Methods**

### 400 *Reagents*

401 250 nm gold colloid fiducials were purchased from BBI Solutions (EM.GC250, batch 026935). The  
402 working mixture was prepared via sedimentation of 1 mL of stock solution by centrifugation (12×g, 5  
403 mins, RT) and then resuspending the pellet in 50 µL HBSS. The fiducials were sonicated at 80 kHz  
404 (100% power) and 6°C to prevent aggregation. 3 mm gold EM grids with a holey carbon film (R 2/2,  
405 200 mesh) were purchased from Quantifoil (Cat# AU G200F1 finder, batches Q45352 & Q45353). Poly-  
406 L-lysine was purchased from Sigma Aldrich (Cat# P4832).

### 407 *Cell Lines*

408 U2OS cells (ATCC HTB-96; RRID CVCL\_0042) and human foreskin fibroblast cells immortalized with  
409 human telomerase reverse transcriptase (HFF-hTERT cells)<sup>70</sup> were cultured in Dulbecco's Modified  
410 Eagle's Medium (DMEM; Thermo Fisher Scientific, Cat# 450 11590366) supplemented with 10% (v/v)  
411 fetal bovine serum (FBS; Capricorn, Cat#: FBS-11A), L-glutamine (Thermo Fisher Scientific, Cat#  
412 25030081), and penicillin/streptomycin (10000 U/ml; Thermo Fisher Scientific, Cat# 15070063). Hanks'  
413 Balanced Salt Solution (HBSS; Thermo Fisher Scientific, Cat# 14175095) and 0.25% Trypsin-EDTA  
414 (Thermo Fisher Scientific, Cat# 25200056) were used to wash and detach adherent cells, respectively.  
415 Cells were maintained in a humidified 5% CO<sub>2</sub> atmosphere at 37°C.

### 416 *Recombinant Viruses*

417 Infections were performed using recombinant HSV-1 strain KOS expressing either the endogenously  
418 tagged viral proteins eYFP-VP26 and gM-mCherry (Figure 1) or the endogenously tagged viral proteins  
419 eYFP-ICP0 and gC-mCherry (timestamp HSV-1, Figures 2-5 and Supplementary Figures 1-2)<sup>16</sup>, to  
420 allow distinction between early and late stages of infection in U2OS and HFF-hTERT cells, with the  
421 exception of the leftmost panel in **Fig. 1I** for which a non-fluorescent wild-type HSV-1 strain KOS was  
422 used. Virus stocks were prepared by infection of Vero cells at low MOI (0.01) for 3–5 days, until  
423 cytopathic effect was evident, before scraping cells into the medium. The cells were frozen at -70°C,  
424 thawed and sonicated at 50 amps for 40 seconds. Crude virus stocks were clarified by centrifugation at  
425 3,200×g in a benchtop centrifuge, aliquoted, and viral titers of the aliquots were quantified on Vero and  
426 U2OS cells as described previously (71).



427 *Infection Assays*

428 For widefield imaging at ambient temperatures, HFF-hTERT and U2OS cells were seeded directly in 6-  
429 well plates overnight at  $2 \times 10^5$  cells per well. The cells were infected with the recombinant HSV-1 at 1–  
430 3 PFU per cell in a low volume of media (500  $\mu$ L) and this was designated as the start time of infection.  
431 To maximize adsorption of virus, cells were incubated in the low-volume media for 1 hour in a humidified  
432 5% CO<sub>2</sub> atmosphere at 37°C and the plates were swirled every 15 minutes. The inoculum was diluted  
433 to 2 mL with medium and cells were incubated for 9-, 12-, 16- or 24-hours in total. The cells were  
434 washed twice with HBSS and were fixed with 4% (v/v) formaldehyde for 20 minutes. The fixed cells  
435 were washed three times with HBSS before imaging.

436 For widefield imaging under cryogenic conditions and cryoSXT, EM grids were glow discharged and  
437 treated with filtered poly-L-lysine for 10 minutes as described previously (26).  $3 \times 10^5$  cells per well were  
438 seeded in 6-well plates containing the treated EM grids and were incubated overnight. Subsequently,  
439 the cells were infected with 1 PFU per cell of timestamp HSV-1 as described above and were incubated  
440 for 9 hours alongside uninfected controls. The EM grids were overlaid with 2  $\mu$ L of the gold fiducial  
441 working mixture described in the Reagents section. A Leica EM GP2 plunge freezer was used to blot  
442 the grids for 0.5–1 s at 30°C and 80% humidity. The grids were plunged into liquid nitrogen-cooled liquid  
443 ethane and then transferred into liquid nitrogen storage before imaging.

444 *Widefield Microscopy*

445 For room temperature samples, a Zeiss AxioImager2 microscope with an achromatic 50 $\times$  air objective  
446 (Zeiss LD EC Epiplan-Neofluar 50x/0.55 DIC M27; NA=0.55; free working distance=9.1 mm) was used  
447 to image fixed infected cells grown on plastic 6-well plates. Fluorescent images were collected using  
448 the Zeiss 46 HE YFP filter (Excitation  $500 \pm 25$  nm, Emission  $535 \pm 30$  nm) and the Zeiss 64 HE mPlum  
449 filter (Excitation  $587 \pm 25$  nm, Emission  $647 \pm 70$  nm).

450 For cryo-widefield microscopy, cells at early- and late-stages of infection were identified based on the  
451 spatiotemporal expression of eYFP-ICP0 and gC-mCherry using a Zeiss AxioImager2 microscope with  
452 an achromatic 50 $\times$  objective (described above) without immersion. The microscope was equipped with  
453 a liquid nitrogen cryostage (Linkam) to maintain the sample at 77 K during imaging. Each grid was

454 mapped in its entirety in the brightfield and fluorescent channels (Zeiss 46 HE YFP filter and HE mPlum  
455 filter as described above) using the LINK software (Linkam Scientific).

#### 456 *Cryo-Soft-X-Ray Tomography*

457 X-ray images were collected using an UltraXRM-S/L220c X-ray microscope (Carl Zeiss X-ray  
458 Microscopy) at beamline B24 at the UK synchrotron Diamond Light Source. Grids were imaged in a  
459 liquid nitrogen-cooled vacuum chamber and samples were illuminated with 500 eV X-rays ( $\lambda = 2.48$  nm)  
460 for 0.5 or 1 s per projection. The transmitted light was focused by diffraction using zone plate objectives  
461 with nominal resolution limits of either 25 nm or 40 nm. The 25 nm zone plate offers higher resolution  
462 but captures a smaller field of view ( $\sim 10 \times 10$   $\mu\text{m}$ ) than the 40 nm zone plate ( $\sim 16 \times 16$   $\mu\text{m}$ ). Transmitted  
463 images were collected using a 1024B Pixis CCD camera (Princeton instruments). X-ray mosaic images  
464 ( $7 \times 7$  images capturing  $66.2 \times 66.2$   $\mu\text{m}$  for the 25 nm objective and  $106.0 \times 106.0$   $\mu\text{m}$  for the 40 nm  
465 objective) were collected from different areas on the grid to assess overall cell morphology. For  
466 identification of early and late stages of infection, X-ray mosaics were compared with fluorescent  
467 imaged acquired on the cryo-widefield microscope to identify specific infected cells. These mosaics  
468 were also used to identify regions of interest for tomography. Tilt series of projections were collected  
469 from these regions by rotating the sample around an axis normal to the incident X-ray beam by up to  
470  $120^\circ$  in increments of  $0.2^\circ$  or  $0.5^\circ$  per image, with maximum tilt angles of  $-60^\circ$  and  $+60^\circ$  and  $-70^\circ$  and  
471  $+70^\circ$  for the 25nm and 40nm objective respectively. SXT tilt series were processed using IMOD (version  
472 4.9.2)<sup>31</sup>. The images were aligned along a single axis. A coarse alignment was performed by cross-  
473 correlation with a high frequency cut-off radius of 0.1. Coarsely aligned tilt series were further aligned  
474 manually using gold fiducials and dark cellular compartments, such as lipid droplets. A boundary model  
475 was generated to reorient the 3D data in case the sample was collected at an angle and final alignment  
476 was performed using linear interpolation. Tomograms were generated using back projection followed  
477 by 20 iterations of a simultaneous iterations reconstruction technique (SIRT)-like filter to reduce noise.

#### 478 *Segmentation*

479 Mitochondria were segmented using *Contour*, a bespoke semi-automated segmentation and  
480 quantitation tool developed with Python 3. Full details on *Contour* will be described elsewhere but,  
481 briefly, *Contour* automatically segments high contrast features such as mitochondria by thresholding  
482 and then applying a restriction on the minimum number of consecutive segmented pixels vertically and

483 horizontally. Next, gaps in the segmented volume can be filled in by running this algorithm in local  
484 regions of interest. Separate elements in the segmented volume are differentiated by grouping of  
485 neighbouring voxels together. The differentiated elements are colour coded and their volumes are  
486 quantitated from the number of voxels. The edges of the segmented elements are smoothed in each  
487 image plane by translating the image by one pixel in all eight cardinal and ordinal directions in the XY  
488 plane and calculating the median pixel value for all these translations. A 3D Gaussian filter with a sigma  
489 of 2 was also added using Fiji to further smoothen the elements<sup>72</sup>. In *Contour*, the width of each  
490 segmented element was calculated by finding all the coordinates of voxels at the perimeter of  
491 segmented elements and calculating the largest modulus between any two coordinates. Segmented  
492 volumes of cytoplasmic vesicles were generated manually using the Segmentation Editor 3.0.3 ImageJ  
493 plugin<sup>72</sup> and these were imported into *Contour* to differentiate between segmented elements and  
494 quantitate the width of the vesicles. Segmented volumes were visualized in 3D using the 3D Viewer  
495 plugin in ImageJ<sup>72</sup>.

#### 496 *Graphs and statistics*

497 Distributions of capsid and virion widths were illustrated using a Violin SuperPlot<sup>73</sup>, with data grouped  
498 by source tomograms. The stacked area plots for the proportion of infected cells at different stages of  
499 infection were generated using the ggplot2 package<sup>74</sup> in R studio<sup>75</sup>. The distribution of vesicle widths  
500 were illustrated using a SuperPlot<sup>76</sup>, with data grouped by source tomograms. The numbers of  
501 mitochondrial branch points (branching nodes) were illustrated using a Violin SuperPlot<sup>73</sup>, with data  
502 grouped by replicate. A two-tailed paired t-test was used to compare the width of the nuclear envelope  
503 at a site of primary envelopment with the width of the nuclear envelope elsewhere on the same  
504 tomogram using Excel (Microsoft). A Wilcox test for unequal variance was used to assess a significant  
505 difference in the widths of capsids and virions using R Studio<sup>75</sup>. One-way ANOVA and Tukey tests were  
506 used to assess significant differences in the mean vesicle width using Prism version 8.2.1 (GraphPad  
507 Software) and in the number of mitochondrial branching nodes (using R Studio<sup>75</sup>).

508

509 **Acknowledgements**

510 We thank Diamond Light Source for access to beamline B24 (mx18925, mx19958, bi21485 and  
511 bi23508) and the experimental hall coordinators for helpful support. We thank members of beamline  
512 B24 at the Diamond Light Source (Mohamed Koronfel, Ilias Kounatidis, Chidinma Okalo, and Matt  
513 Spink) for technical support with cryoSXT. We thank João Ferreira Fernandes (University of Oxford)  
514 and Thomas Fish (Diamond Light Source) for help with the development of *Contour*. We thank Harriet  
515 Groom (University of Cambridge) for reading and advising on the manuscript. This work was supported  
516 by a PhD studentship co-funded by Diamond Light Source and the Department of Pathology, University  
517 of Cambridge, to KLN, by a Biotechnology and Biological Sciences Research Council (BBSRC)  
518 Research Grant to CMC (BB/M021424/1), and by a Sir Henry Dale Fellowship, jointly funded by the  
519 Wellcome Trust and the Royal Society, to SCG (098406/Z/12/B).

520 **Data Availability**

521 Original imaging data for tomograms illustrated in the manuscript is deposited at the BioImage Archive  
522 (<https://www.ebi.ac.uk/biostudies/BioImages>) and EMPIAR  
523 (<https://www.ebi.ac.uk/pdbe/emdb/empiar/>). The accession numbers for the data are EMPIAR:  
524 **EMPIAR-XXXX, EMPIAR-XXXX, ...** and BioImage Archive: **S-BIADXX, S-BIADXX, ...**. Additional tilt  
525 series and tomograms used for quantitative analysis have been deposited with the University of  
526 Cambridge Apollo Repository, available at <https://doi.org/10.17863/CAM.XXXX>.

527 **Table 1. Collection of cryoSXT data to analyse changes in cellular morphology accompanying**  
528 **infection.** CryoSXT data was collected using a 25 nm zone plate from multiple uninfected cells or cells  
529 at early and late stages of infection across three independent replicates. Tiled X-ray projections ('X-ray  
530 mosaics') with a 66.2×66.2 μm field of view were collected at multiple areas on the sample grid to  
531 identify cells of interest. Tilt series were collected at perinuclear or peripheral regions of the cytoplasm  
532 within these cells and were processed to generate tomograms.

| Replicate | Stage of infection | X-ray mosaics | Cells in mosaics | Cells imaged by tomography | Tomograms |
|-----------|--------------------|---------------|------------------|----------------------------|-----------|
| 1         | Uninfected         | 19            | 30               | 18                         | 29        |
|           | Early              | 4             | 4                | 2                          | 4         |
|           | Late               | 8             | 13               | 10                         | 14        |
| 2         | Uninfected         | 10            | 20               | 14                         | 20        |
|           | Early              | 9             | 13               | 11                         | 13        |
|           | Late               | 10            | 10               | 8                          | 12        |
| 3         | Uninfected         | 8             | 27               | 26                         | 27        |
|           | Early              | 6             | 7                | 5                          | 5         |
|           | Late               | 8             | 13               | 13                         | 15        |

533

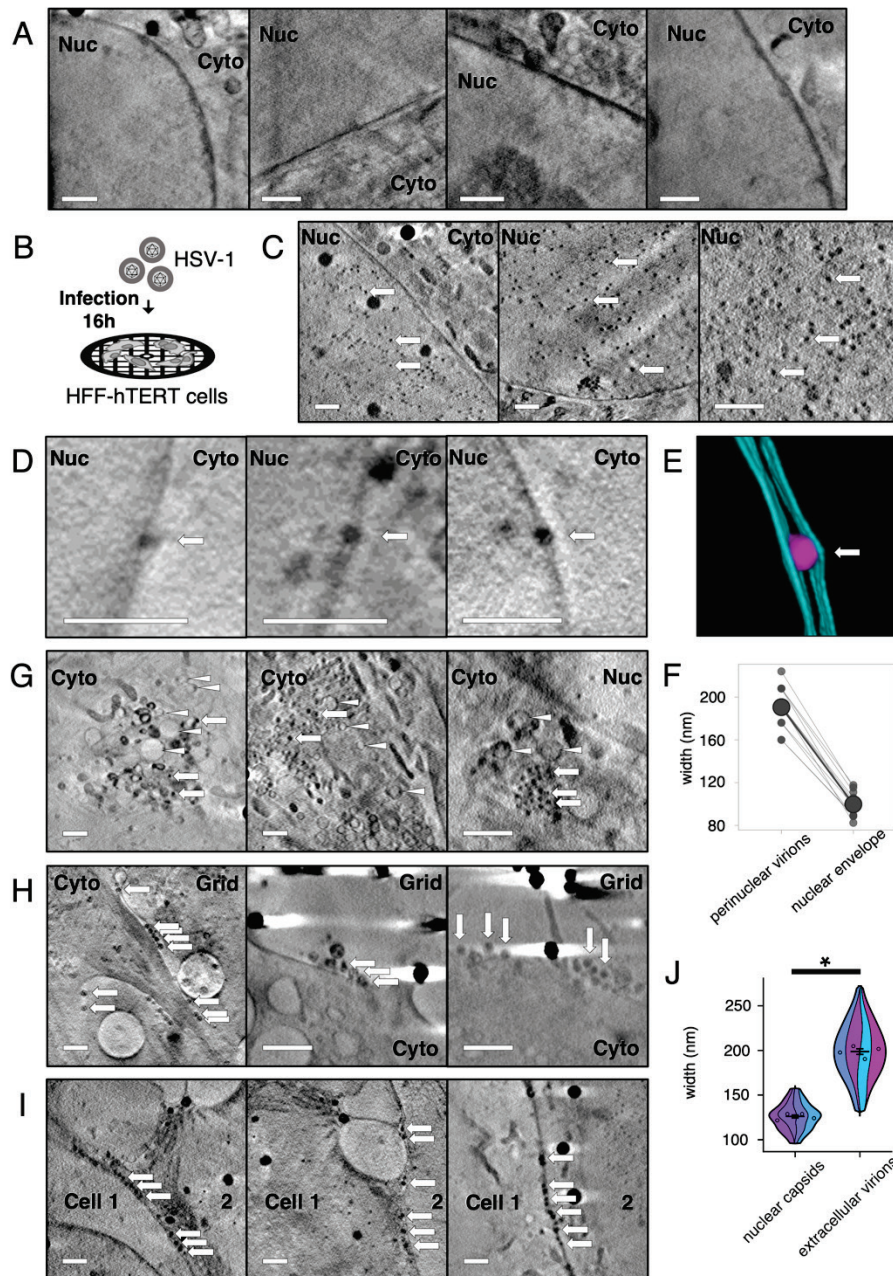

534

535 **Fig. 1. Soft X-ray tomography imaging at cryogenic temperatures of HSV-1-infected HFF-hTERT**  
 536 **cells identifies virus particles.** HFF-hTERT cells were grown on EM grids and plunge frozen 16 hpi  
 537 with 2 plaque-forming units of HSV-1 per cell or mock infection. All tomograms were reconstructed from  
 538 X-ray projections collected using zone plate objective optics affording 25 nm (**A**) or 40 nm (**C, D, G–I**)  
 539 resolution; scale bars = 1  $\mu$ m. (**A**) The nucleus (Nuc) has a largely uniform X-ray absorbance in  
 540 uninfected HFF-hTERT cells. Cyto, cytoplasm. (**B**) Schematic of infection workflow. (**C**) In HSV-1  
 541 infected cells many dark puncta are evident in the nucleus, consistent with these puncta being newly  
 542 assembled HSV-1 capsids. (**D**) Dark puncta were also observed within the perinuclear space of the

22

543 nuclear envelope, consistent with these being HSV-1 capsids undergoing primary envelopment/de-  
544 envelopment to leave the nuclear space. **(E)** Segmentation of a perinuclear viral particle (magenta) and  
545 the two membranes of the nuclear envelope (cyan). The perinuclear viral particle distends the nuclear  
546 envelope. **(F)** The width of perinuclear viral particles plus associated membranes is  $190.5 \pm 6.01$  nm  
547 SEM (N=11; 20.8 nm SD), which is greater than the width of the nuclear membrane elsewhere ( $99.8 \pm$   
548  $3.57$  nm SEM; N=11; 11.9 nm SD). **(G)** HSV-1 capsids (arrows) were also observed in the cytoplasm  
549 alongside vesicles (arrowheads). **(H)** Multiple particles are observed along the surface of infected cells,  
550 consistent with these being assembled HSV-1 virions that have exited the infected cell. **(I)** HSV-1 virions  
551 are also observed at the junctions between cells. **(J)** The width of the nuclear capsids is  $125.8 \pm 1.70$   
552 nm SEM (n=80 from 4 tomograms), consistent with these being HSV-1 capsids ( $\sim 125$  nm<sup>28,29</sup>). The  
553 width of the extracellular virions is  $198.6 \pm 3.48$  nm SEM (n=80 from 4 tomograms), consistent with  
554 these being fully-enveloped HSV-1 virions ( $\sim 200$  nm<sup>36</sup>). Due to unequal variance, a Wilcox test was  
555 performed to determine a significant difference in the width of nuclear capsids and extracellular virions  
556 (W=126,  $p$ -value $<2.2 \times 10^{-16}$ ). Error bars show mean  $\pm$  SEM.

557

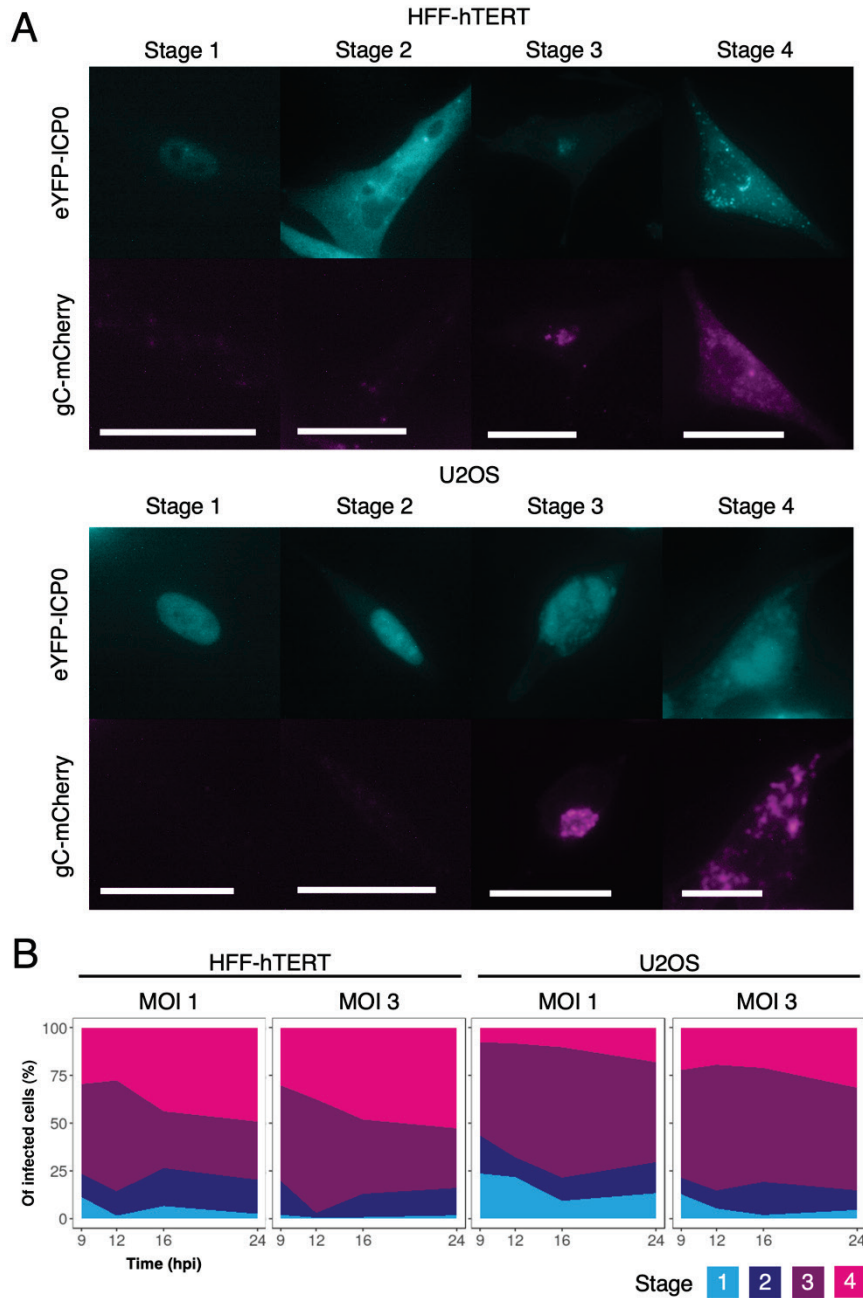

558

559 **Fig. 2. Temporal analysis of HSV-1 infection using the dual-fluorescent timestamp virus. (A)**  
560 Room temperature widefield fluorescence imaging of timestamp HSV-1 infected HFF-hTERT and  
561 U2OS cells was used to delineate between four stages of infection based on the expression and  
562 localization of the early protein eYFP-ICP0 and the late protein gC-mCherry<sup>16</sup>. The spatiotemporal  
563 expression of these fusion proteins was similar in HFF-hTERT and U2OS cells, except for partial  
564 retention of eYFP-ICP0 in the nucleus of U2OS cells during stages 2–4. Scale bars = 50  $\mu$ m. **(B)** The  
565 proportion of infected cells in each stage was determined using widefield imaging and different  
566 multiplicities of infection (MOIs) in HFF-hTERT and U2OS cells at 9, 12, 16, and 24 hpi.



567

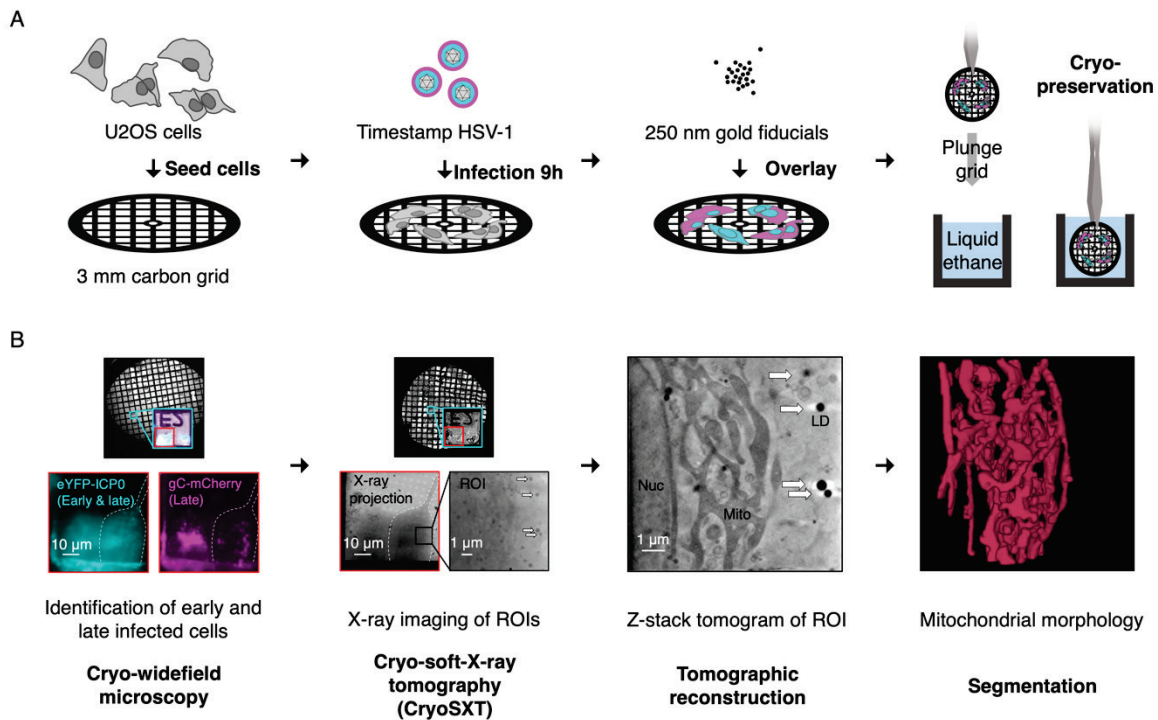

568

569 **Fig. 3. Workflow for multi-modal imaging of HSV-1 infected cells.** (A) Preparation of infected cells  
570 samples for multimodal imaging. U2OS cells are cultured on holey-carbon EM grids and infected with  
571 recombinant 'timestamp' HSV-1, expressing fluorescently tagged proteins eYFP-ICP0 and gC-mCherry  
572 that allow identification of the stage of infection for each cell under investigation. At 9 hpi, gold fiducials  
573 are overlaid onto the sample to facilitate image registration and grids are cryopreserved in a near-  
574 native state by plunge freezing in liquid ethane. (B) Multi-modal imaging of infected U2OS cells. A  
575 widefield microscope with a cryo stage is used to locate the grid positions of infected cells. The stage  
576 of infection for each cell is determined based on the differential expression and localisation of the eYFP-  
577 ICP0 and gC-mCherry (as shown in Fig. 2). These grids are then loaded into the cryo-soft-X-ray  
578 microscope at Diamond Light Source beamline B24 and are illuminated with soft X-rays at the marked  
579 grid positions. X-ray projections of regions of interest (ROIs) are collected at multiple angles and aligned  
580 using the gold fiducials and intracellular features, such as lipid droplets (LDs), with the program IMOD<sup>31</sup>.  
581 Tomograms are reconstructed from these projections using IMOD to compare intracellular morphology  
582 between uninfected cells and those at early- or late-stages of infection. Segmentation facilitates  
583 quantitation and visualization in three dimensions of the observed cellular structures.

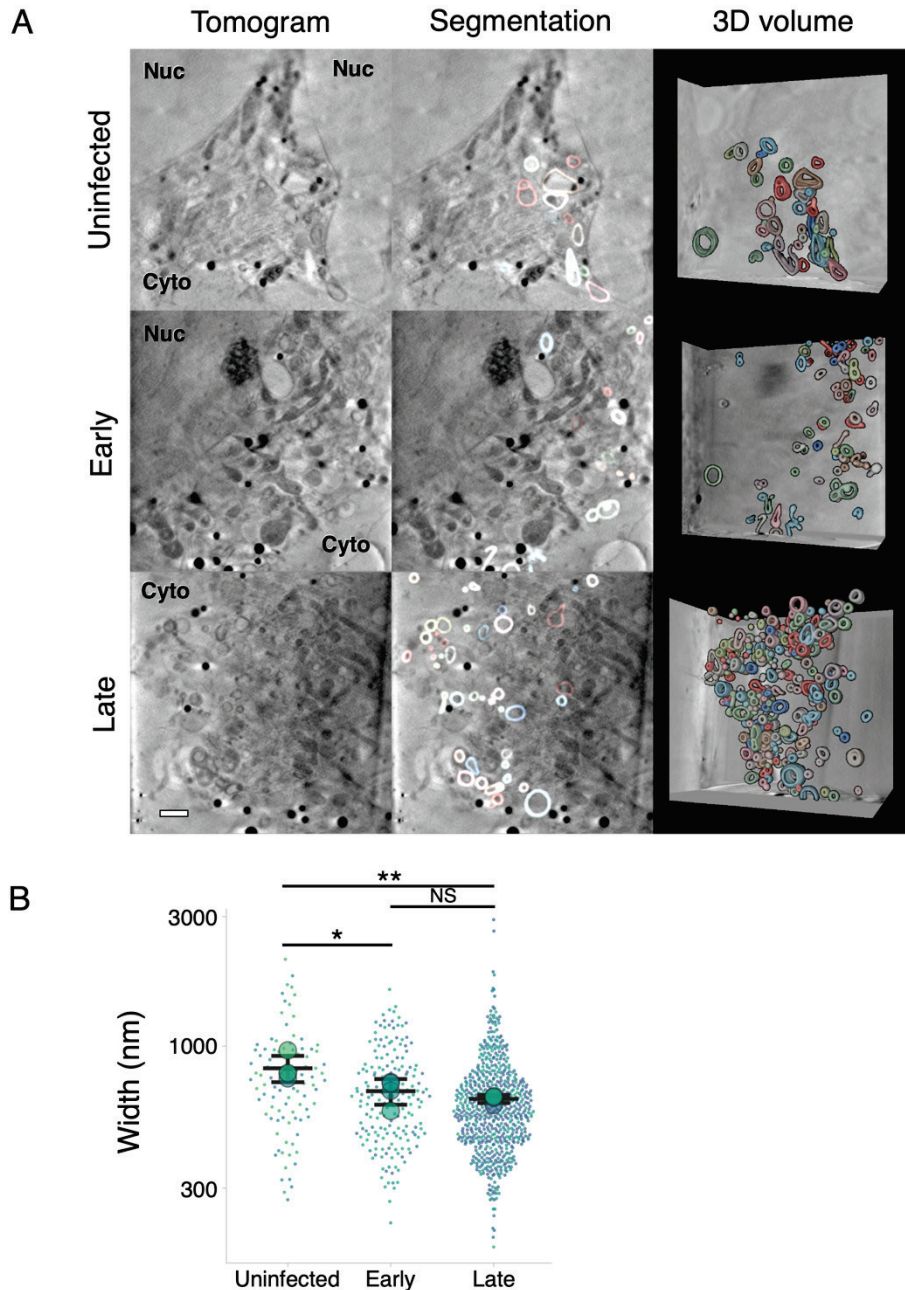

584

585 **Fig. 4. Remodelling of cytoplasmic vesicles during HSV-1 infection.** CryoSXT tomograms were  
586 recorded of cells classified as uninfected, early-stage infection (stages 1+2) or late-stage infection  
587 (stages 3+4) with timestamp HSV-1 based on fluorescent cryo-wide field microscopy. Data are  
588 representative of three independent experiments. Scale bar = 1  $\mu$ m. **(A)** A higher concentration of  
589 vesicles is observed at the juxtannuclear compartment in cells at early- or late-stages of infection  
590 compared with uninfected cells. **(B)** The maximum width of each vesicle in three-dimensions was  
591 measured in *Contour* (manuscript in preparation). Vesicles with a spherical, ellipsoidal, or dumbbell  
592 shape were included in the analysis but vesicles with a shape that didn't fall into these categories were

593 excluded. Intra-luminal vesicles and vesicles that were not individually resolved by the segmentation  
594 were also excluded from the analysis. Significance of differences was assessed with a one-way ANOVA  
595 and Tukey tests for the combinations: uninfected-early ( $p=0.04$ ), uninfected-late ( $p=0.01$ ), and early-  
596 late ( $p=0.62$ ). Big circles show the mean vesicle width per tomogram (4 tomograms per condition). Error  
597 bars show overall mean  $\pm$  SD.

598

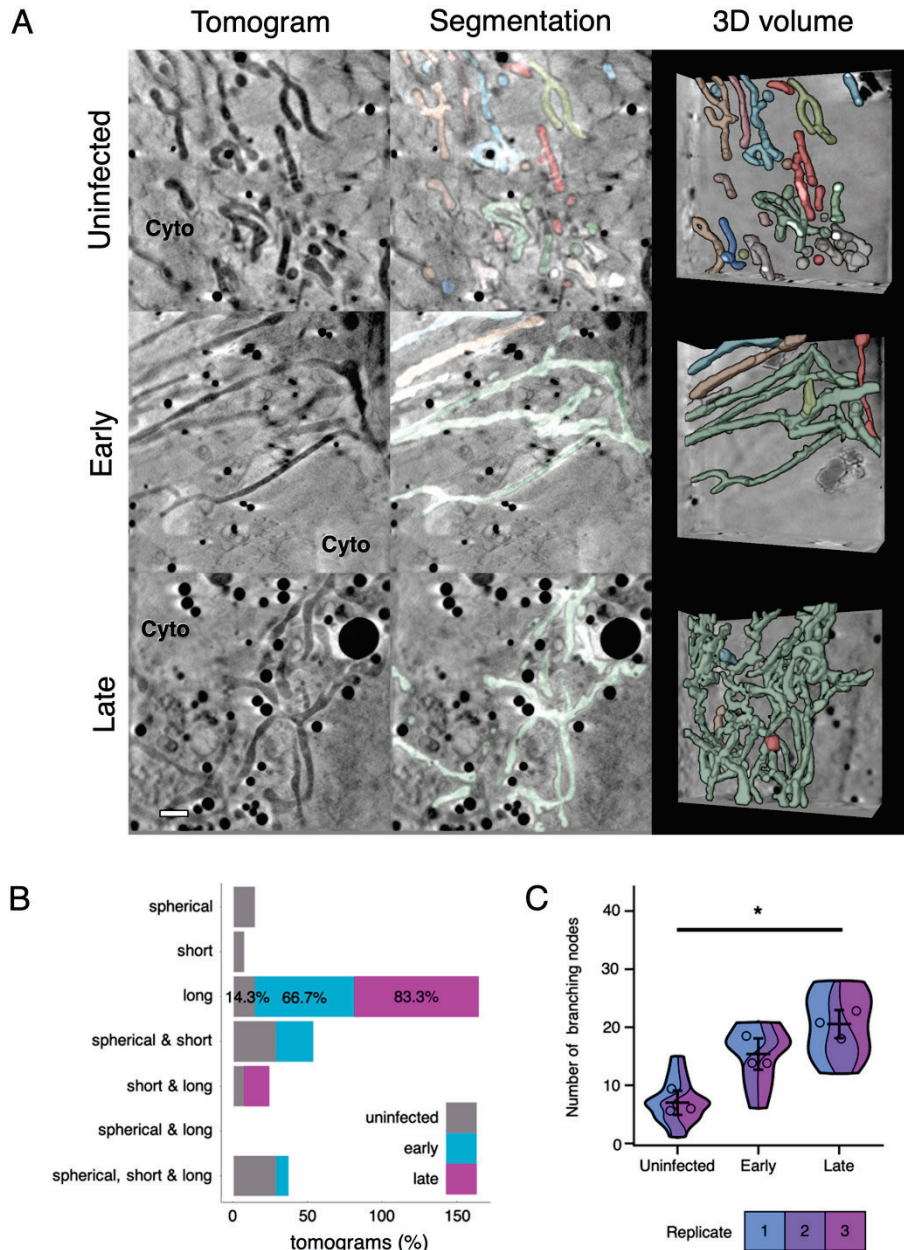

599

600 **Fig. 5. Remodelling of mitochondria during HSV-1 infection.** Morphological changes to  
 601 mitochondria were assessed from cryoSXT tomograms collected from uninfected cells and cells at  
 602 early- or late-stages of infection with timestamp HSV-1. Data are representative of three independent  
 603 experiments. Scale bars = 1  $\mu$ m. **(A)** A shift towards elongated and branched mitochondria was  
 604 observed during infection. Mitochondria were segmented and differentiated using *Contour* to highlight  
 605 the abundance and 3D geometry of individual mitochondria. **(B)** The percentages of tomograms with  
 606 long mitochondria were greater for cells at early- or late-stages of infection than for uninfected cells in  
 607 replicate 2. Mitochondrial morphology was more heterogenous in uninfected cells. See **Supp. Fig 2** for

608 equivalent data from replicates 1 and 3. **(C)** The numbers of branching nodes were calculated for 45  
609 tomograms across all replicates and significant differences in the number of nodes between uninfected  
610 cells and those at late stages of infection were determined for each replicate using ANOVA and Tukey  
611 tests ( $p < 0.05$ ). Error bars show mean  $\pm$  SD.

612

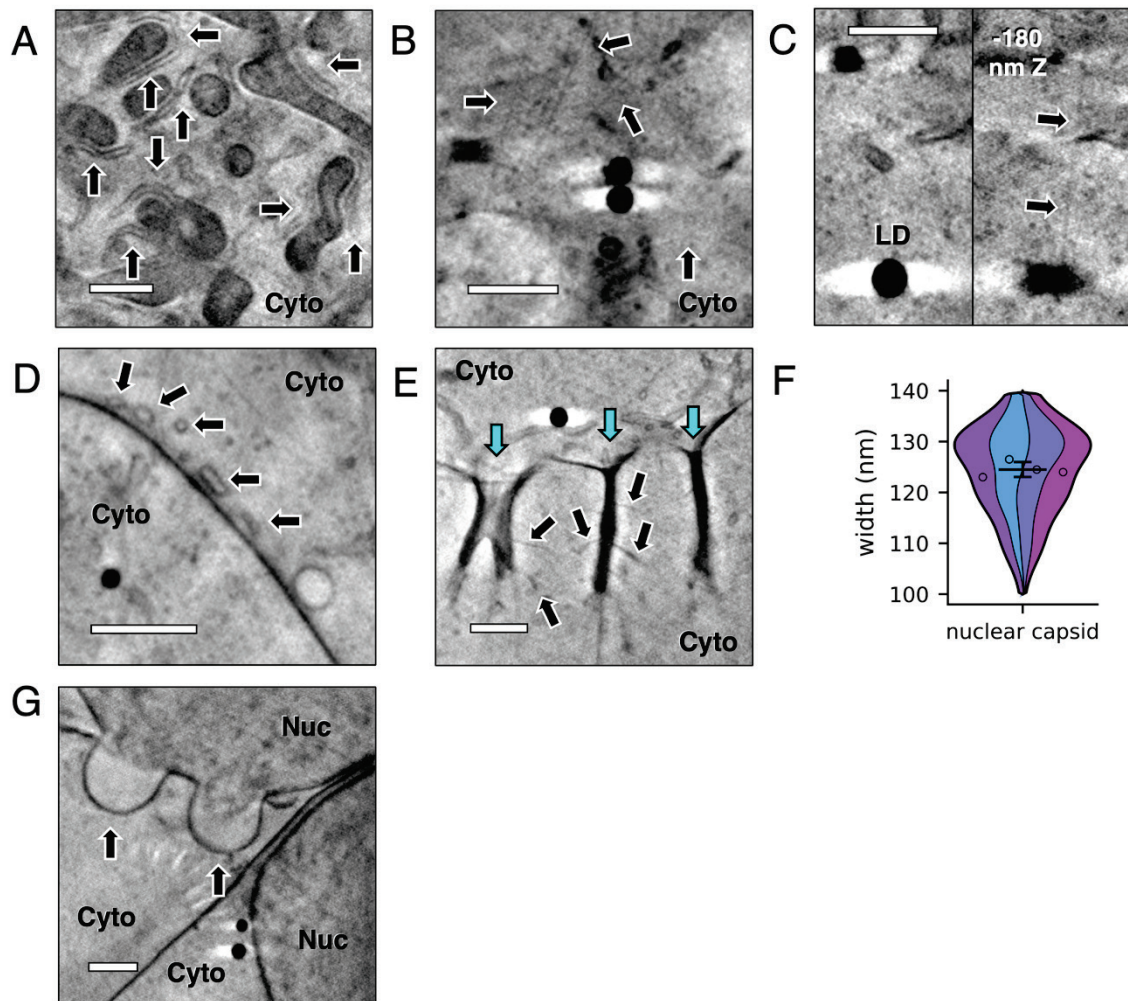

613

614 **Supp. Fig. 1. High resolution structures visible with the 25 nm zone plate objective.** 139 CryoSXT  
615 tomograms were recorded from 107 cells using a 25 nm zone plate (ZP) objective and several structures  
616 that were unrelated to HSV-1 infection were observed, including some that were not visible using the  
617 40 nm zone plate objective. (A) The endoplasmic reticulum (ER) forms a silhouette (arrows) around the  
618 mitochondria and the ER lumen is visible with the 25 nm zone plate. Cyto, cytoplasm. (B) Linear  
619 structures resembling cytoskeletal filaments are visible with the 25 nm zone plate (arrows). (C) A  
620 putative cytoskeletal filament (arrows) is in close apposition to a lipid droplet (LD) and may represent a  
621 physical interaction. (D) Small vesicles with widths of 150–300 nm in the peripheral cytoplasm are  
622 observed (arrows). (E) Large internalisations of the plasma membrane with depths of 1.6–2.2 μm (cyan)  
623 and smaller side extensions (black arrows) are visible and may represent events of clathrin-independent  
624 bulk endocytosis<sup>77</sup>. (F) The width of nuclear capsids was remeasured after imaging with the 25 nm zone  
625 plate: 124.5 nm ± 0.96 nm SEM (n=80 from 4 tomograms; 8.55 nm SD). (G) Bulging of the nuclear  
626 envelope is observed (arrows). We initially observed these in HSV-1 infection and thought it may

30

627 represent a virus-directed decrease in the integrity of the nuclear envelope, but we found multiple  
628 examples in uninfected cells suggesting that they are a general feature of U2OS cells. Nuc, nucleus.

629

630

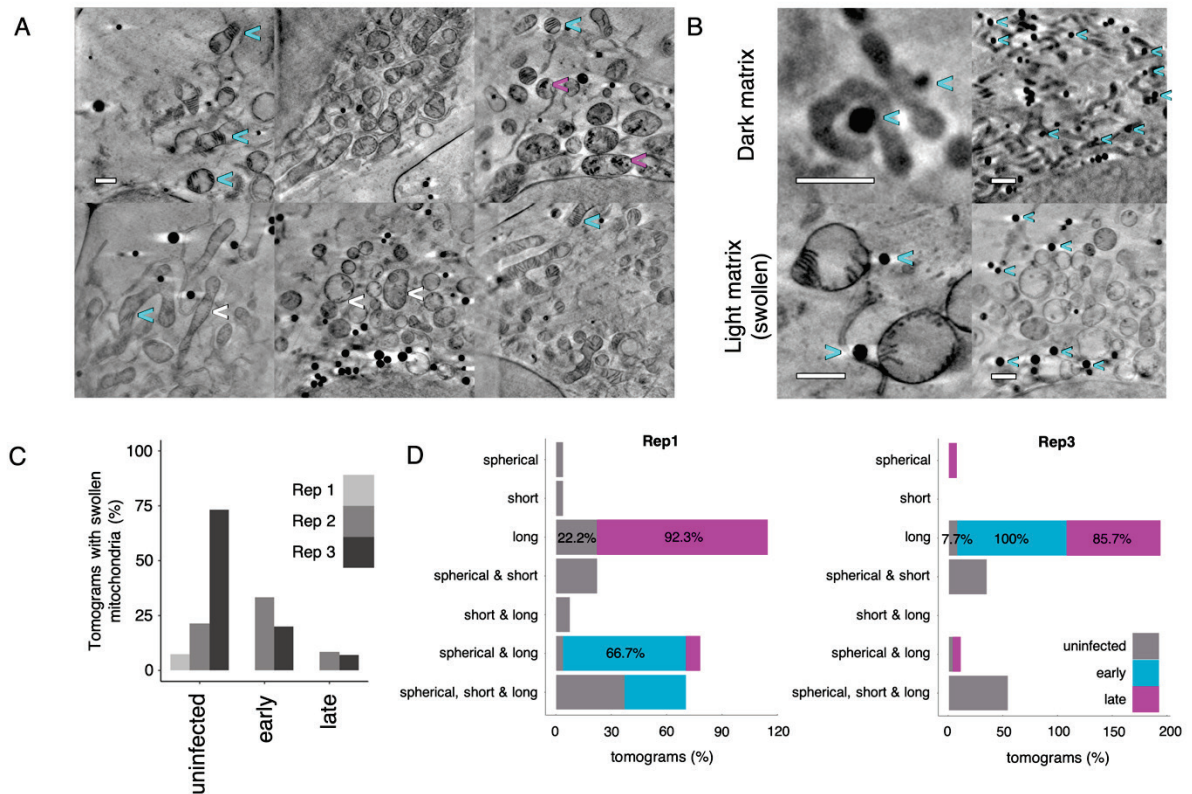

631

632 **Supp. Fig. 2. The heterogeneous morphology of mitochondria.** Heterogenous mitochondrial  
 633 morphologies are observed in cryoSXT tomograms collected from uninfected cells and cells at early  
 634 and late stages of infection with timestamp HSV-1. Scale bars = 1  $\mu$ m. **(A)** In some cases, mitochondria  
 635 have light matrices with highly contrasting cristae (cyan arrows). This “swollen” phenotype has been  
 636 reported to occur during cytochrome *c* release from porous mitochondria during apoptosis<sup>44</sup>. Dark  
 637 matter is also observed in the matrix (magenta arrows) and may represent vesiculation. Small dark  
 638 puncta are present in the matrix (white arrows) and could represent vesicles or short cristae. **(B)**  
 639 Mitochondria with dark matrices were commonly coupled with lipid droplets (cyan arrows) but most lipid  
 640 droplets were uncoupled from swollen mitochondria. **(C)** The percentages of tomograms with swollen  
 641 mitochondria for uninfected cells and cells at early- or late-stages of infection in three independent  
 642 replicates. **(D)** The percentages of tomograms collected from uninfected cells and those at early- or  
 643 late-stages on infection in replicates 1 and 3 that contain different combinations of mitochondrial  
 644 morphologies.



645 **Supp. Video 1. Segmentation of vesicles and mitochondria in the cytoplasm of a cell at a late**  
646 **stage of infection.** CryoSXT data was collected from U2OS cells infected for 9 hours with 1 plaque-  
647 forming unit per cell of the timestamp HSV-1 virus. Cryo-fluorescence microscopy revealed that this cell  
648 was at a late stage of infection. The mitochondria were segmented using *Contour* and separate  
649 mitochondria are colour-coded in shades of orange, red, pink and purple. Cytoplasmic vesicles were  
650 segmented using *Segmentation Editor* in *ImageJ*. The vesicles were later differentiated and color-coded  
651 using *Contour* and are displayed here in shades of blue and green. Field of view is 9.46×9.46 μm.

652 **Supp. Video 2. Segmentation of cytoplasmic vesicles reveals the effect of HSV-1 infection on**  
653 **vesicle concentration at juxtannuclear sites.** CryoSXT data was collected from uninfected U2OS cells  
654 and U2OS cells infected for 9 hours with 1 plaque-forming unit per cell of the timestamp HSV-1 virus.  
655 Cytoplasmic vesicles were segmented using *Segmentation Editor* in *ImageJ*. The vesicles were later  
656 differentiated and colour-coded using *Contour*. Fields of view are 9.46×9.46 μm.

657 **Supp. Video 3. Segmentation of mitochondria reveals the effect of HSV-1 infection on**  
658 **mitochondrial morphology.** CryoSXT data was collected from uninfected U2OS cells and U2OS cells  
659 infected for 9 hours with 1 plaque-forming unit per cell of the timestamp HSV-1 virus. Mitochondria were  
660 segmented and colour-coded using *Contour* and appear elongated and branched in cells at late stages  
661 of infection. Fields of view are 9.46×9.46 μm.

662

663 **References**

- 664 1. Nicoll, M. P., Proença, J. T. & Efstathiou, S. The molecular basis of herpes simplex virus latency.  
665 *FEMS Microbiol. Rev.* **36**, 684–705 (2012).
- 666 2. Owen, D., Crump, C. & Graham, S. Tegument Assembly and Secondary Envelopment of  
667 Alphaherpesviruses. *Viruses* **7**, 5084–5114 (2015).
- 668 3. Ahmad, I. & Wilson, D. W. HSV-1 Cytoplasmic Envelopment and Egress. *Int. J. Mol. Sci.* **21**, 5969  
669 (2020).
- 670 4. Mettenleiter, T. C. Herpesvirus Assembly and Egress. *J. Virol.* **76**, 1537–1547 (2002).
- 671 5. Johnson, D. C. & Baines, J. D. Herpesviruses remodel host membranes for virus egress. *Nat. Rev.*  
672 *Microbiol.* **9**, 382–394 (2011).
- 673 6. Crump, C. Virus Assembly and Egress of HSV. in *Human Herpesviruses* (eds. Kawaguchi, Y.,  
674 Mori, Y. & Kimura, H.) 23–44 (Springer Singapore, 2018). doi:10.1007/978-981-10-7230-7\_2.
- 675 7. Brown, J. C. & Newcomb, W. W. Herpesvirus capsid assembly: insights from structural analysis.  
676 *Curr. Opin. Virol.* **1**, 142–149 (2011).
- 677 8. Bigalke, J. M. & Heldwein, E. E. Structural basis of membrane budding by the nuclear egress  
678 complex of herpesviruses. *EMBO J.* **34**, 2921–2936 (2015).
- 679 9. Bigalke, J. M. & Heldwein, E. E. The Great (Nuclear) Escape: New Insights into the Role of the  
680 Nuclear Egress Complex of Herpesviruses. *J. Virol.* **89**, 9150–9153 (2015).
- 681 10. Bigalke, J. M. & Heldwein, E. E. Nuclear Exodus: Herpesviruses Lead the Way. *Annu. Rev. Virol.*  
682 **3**, 387–409 (2016).
- 683 11. Zeev-Ben-Mordehai, T. *et al.* Crystal Structure of the Herpesvirus Nuclear Egress Complex  
684 Provides Insights into Inner Nuclear Membrane Remodeling. *Cell Rep.* **13**, 2645–2652 (2015).
- 685 12. Hernández Durán, A. *et al.* Protein interactions and consensus clustering analysis uncover insights  
686 into herpesvirus virion structure and function relationships. *PLOS Biol.* **17**, e3000316 (2019).
- 687 13. Hollinshead, M. *et al.* Endocytic tubules regulated by Rab GTPases 5 and 11 are used for  
688 envelopment of herpes simplex virus. *EMBO J.* **31**, 4204–4220 (2012).
- 689 14. Kotsakis, A., Pomeranz, L. E., Blouin, A. & Blaho, J. A. Microtubule Reorganization during Herpes  
690 Simplex Virus Type 1 Infection Facilitates the Nuclear Localization of VP22, a Major Virion Tegument  
691 Protein. *J. Virol.* **75**, 8697–8711 (2001).

- 692 15. Kim, J. A. *et al.* HSV-1 ICP27 induces apoptosis by promoting Bax translocation to mitochondria  
693 through interacting with 14-3-3 $\theta$ . *BMB Rep.* **50**, 257–262 (2017).
- 694 16. Scherer, K. M. *et al.* A fluorescent reporter system enables spatiotemporal analysis of host cell  
695 modification during herpes simplex virus-1 replication. *J. Biol. Chem.* **296**, 100236 (2021).
- 696 17. Martin, C. *et al.* Herpes Simplex Virus Type 1 Neuronal Infection Perturbs Golgi Apparatus Integrity  
697 through Activation of Src Tyrosine Kinase and Dyn-2 GTPase. *Front. Cell. Infect. Microbiol.* **7**, 371  
698 (2017).
- 699 18. Maeda, F. *et al.* Herpes Simplex Virus 1 UL34 Protein Regulates the Global Architecture of the  
700 Endoplasmic Reticulum in Infected Cells. *J. Virol.* **91**, (2017).
- 701 19. Ayache, J., Beaunier, L., Boumendil, J., Ehret, G. & Laub, D. Artifacts in Transmission Electron  
702 Microscopy. in *Sample Preparation Handbook for Transmission Electron Microscopy* 125–170  
703 (Springer New York, 2010). doi:10.1007/978-0-387-98182-6\_6.
- 704 20. Schnell, U., Dijk, F., Sjollem, K. A. & Giepmans, B. N. G. Immunolabeling artifacts and the need  
705 for live-cell imaging. *Nat. Methods* **9**, 152–158 (2012).
- 706 21. Büttner, M. *et al.* Challenges of Using Expansion Microscopy for Super-resolved Imaging of  
707 Cellular Organelles. *ChemBioChem* **22**, 686–693 (2021).
- 708 22. Harkiolaki, M. *et al.* Cryo-soft X-ray tomography: using soft X-rays to explore the ultrastructure of  
709 whole cells. *Emerg. Top. Life Sci.* **2**, 81–92 (2018).
- 710 23. Lewis, R. A. Medical phase contrast x-ray imaging: current status and future prospects. *Phys. Med.*  
711 *Biol.* **49**, 3573–3583 (2004).
- 712 24. Garman, E. F. Developments in X-ray Crystallographic Structure Determination of Biological  
713 Macromolecules. *Science* **343**, 1102–1108 (2014).
- 714 25. Kounatidis, I. *et al.* 3D Correlative Cryo-Structured Illumination Fluorescence and Soft X-ray  
715 Microscopy Elucidates Reovirus Intracellular Release Pathway. *Cell* **182**, 515-530.e17 (2020).
- 716 26. Okolo, C. A. *et al.* Sample preparation strategies for efficient correlation of 3D SIM and soft X-ray  
717 tomography data at cryogenic temperatures. *Nat. Protoc.* **16**, 2851–2885 (2021).
- 718 27. Pérez-Berná, A. J. *et al.* Structural Changes In Cells Imaged by Soft X-ray Cryo-Tomography  
719 During Hepatitis C Virus Infection. *ACS Nano* **10**, 6597–6611 (2016).
- 720 28. Laine, R. F. *et al.* Structural analysis of herpes simplex virus by optical super-resolution imaging.  
721 *Nat. Commun.* **6**, 5980 (2015).

- 722 29. Yuan, S. *et al.* Cryo-EM structure of a herpesvirus capsid at 3.1 Å. *Science* **360**, eaao7283 (2018).
- 723 30. von Hofsten, O. *et al.* Sub-25-nm laboratory x-ray microscopy using a compound Fresnel zone  
724 plate. *Opt. Lett.* **34**, 2631 (2009).
- 725 31. Mastronarde, D. N. & Held, S. R. Automated tilt series alignment and tomographic reconstruction  
726 in IMOD. *J. Struct. Biol.* **197**, 102–113 (2017).
- 727 32. Blondeau, C. *et al.* Tetherin Restricts Herpes Simplex Virus 1 and Is Antagonized by Glycoprotein  
728 M. *J. Virol.* **87**, 13124–13133 (2013).
- 729 33. Zenner, H. L., Mauricio, R., Banting, G. & Crump, C. M. Herpes simplex virus 1 counteracts tetherin  
730 restriction via its virion host shutoff activity. *J. Virol.* **87**, 13115–13123 (2013).
- 731 34. Johnson, D. C., Webb, M., Wisner, T. W. & Brunetti, C. Herpes Simplex Virus gE/gI Sorts Nascent  
732 Virions to Epithelial Cell Junctions, Promoting Virus Spread. *J. Virol.* **75**, 821–833 (2001).
- 733 35. Vijayakrishnan, S., McElwee, M., Loney, C., Rixon, F. & Bhella, D. In situ structure of virus capsids  
734 within cell nuclei by correlative light and cryo-electron tomography. *Sci. Rep.* **10**, 17596 (2020).
- 735 36. Grünewald, K. *et al.* Three-Dimensional Structure of Herpes Simplex Virus from Cryo-Electron  
736 Tomography. *Science* **302**, 1396–1398 (2003).
- 737 37. Drayman, N., Patel, P., Vistain, L. & Tay, S. HSV-1 single-cell analysis reveals the activation of  
738 anti-viral and developmental programs in distinct sub-populations. *eLife* **8**, e46339 (2019).
- 739 38. Simpson-Holley, M., Colgrove, R. C., Nalepa, G., Harper, J. W. & Knipe, D. M. Identification and  
740 Functional Evaluation of Cellular and Viral Factors Involved in the Alteration of Nuclear Architecture  
741 during Herpes Simplex Virus 1 Infection. *J. Virol.* **79**, 12840–12851 (2005).
- 742 39. Deng, Z. *et al.* HSV-1 Remodels Host Telomeres to Facilitate Viral Replication. *Cell Rep.* **9**, 2263–  
743 2278 (2014).
- 744 40. Cai, W. & Schaffer, P. A. Herpes simplex virus type 1 ICP0 regulates expression of immediate-  
745 early, early, and late genes in productively infected cells. *J. Virol.* **66**, 2904–2915 (1992).
- 746 41. Deschamps, T. & Kalamvoki, M. Impaired STING Pathway in Human Osteosarcoma U2OS Cells  
747 Contributes to the Growth of ICP0-Null Mutant Herpes Simplex Virus. *J. Virol.* **91**, (2017).
- 748 42. Visalli, R. J. & Brandt, C. R. The HSV-1 UL45 18 kDa gene product is a true late protein and a  
749 component of the virion. *Virus Res.* **29**, 167–178 (1993).

- 750 43. Loret, S., Guay, G. & Lippé, R. Comprehensive Characterization of Extracellular Herpes Simplex  
751 Virus Type 1 Virions. *J. Virol.* **82**, 8605–8618 (2008).
- 752 44. Sun, M. G. *et al.* Correlated three-dimensional light and electron microscopy reveals transformation  
753 of mitochondria during apoptosis. *Nat. Cell Biol.* **9**, 1057–1065 (2007).
- 754 45. Miyazono, Y. *et al.* Uncoupled mitochondria quickly shorten along their long axis to form indented  
755 spheroids, instead of rings, in a fission-independent manner. *Sci. Rep.* **8**, 350 (2018).
- 756 46. Eustaquio, T. *et al.* Electron microscopy techniques employed to explore mitochondrial defects in  
757 the developing rat brain following ketamine treatment. *Exp. Cell Res.* **373**, 164–170 (2018).
- 758 47. Bosch, M. *et al.* Mammalian lipid droplets are innate immune hubs integrating cell metabolism and  
759 host defense. *Science* **370**, eaay8085 (2020).
- 760 48. Samrat, S. K., Ha, B. L., Zheng, Y. & Gu, H. Characterization of Elements Regulating the Nuclear-  
761 to-Cytoplasmic Translocation of ICP0 in Late Herpes Simplex Virus 1 Infection. *J. Virol.* **92**, (2018).
- 762 49. Lopez, P., Van Sant, C. & Roizman, B. Requirements for the Nuclear-Cytoplasmic Translocation  
763 of Infected-Cell Protein 0 of Herpes Simplex Virus 1. *J. Virol.* **75**, 3832–3840 (2001).
- 764 50. Lengyel, J., Strain, A. K., Perkins, K. D. & Rice, S. A. ICP27-dependent resistance of herpes  
765 simplex virus type 1 to leptomycin B is associated with enhanced nuclear localization of ICP4 and  
766 ICP0. *Virology* **352**, 368–379 (2006).
- 767 51. Cai, M. *et al.* Identification of the molecular determinants for nuclear import of PRV EP0. *Biol.*  
768 *Chem.* **400**, 1385–1394 (2019).
- 769 52. Padeloup, D., Labetoulle, M. & Rixon, F. J. Differing Effects of Herpes Simplex Virus 1 and  
770 Pseudorabies Virus Infections on Centrosomal Function. *J. Virol.* **87**, 7102–7112 (2013).
- 771 53. Avitabile, E. *et al.* Redistribution of microtubules and Golgi apparatus in herpes simplex virus-  
772 infected cells and their role in viral exocytosis. *J. Virol.* **69**, 7472–7482 (1995).
- 773 54. Vyas, N. *et al.* Cryo-Structured Illumination Microscopic Data Collection from Cryogenically  
774 Preserved Cells. *J. Vis. Exp.* 62274 (2021) doi:10.3791/62274.
- 775 55. Sukhorukov, V. M., Dikov, D., Reichert, A. S. & Meyer-Hermann, M. Emergence of the  
776 Mitochondrial Reticulum from Fission and Fusion Dynamics. *PLoS Comput. Biol.* **8**, e1002745  
777 (2012).
- 778 56. Youle, R. J. & van der Bliek, A. M. Mitochondrial Fission, Fusion, and Stress. *Science* **337**, 1062–  
779 1065 (2012).

- 780 57. Bartolák-Suki, E., Imsirovic, J., Nishibori, Y., Krishnan, R. & Suki, B. Regulation of Mitochondrial  
781 Structure and Dynamics by the Cytoskeleton and Mechanical Factors. *Int. J. Mol. Sci.* **18**, 1812  
782 (2017).
- 783 58. Bowes, T. & Gupta, R. S. Novel mitochondrial extensions provide evidence for a link between  
784 microtubule-directed movement and mitochondrial fission. *Biochem. Biophys. Res. Commun.* **376**,  
785 40–45 (2008).
- 786 59. Silva Ramos, E., Larsson, N.-G. & Mourier, A. Bioenergetic roles of mitochondrial fusion. *Biochim.*  
787 *Biophys. Acta BBA - Bioenerg.* **1857**, 1277–1283 (2016).
- 788 60. Liu, X. & Hajnóczky, G. Altered fusion dynamics underlie unique morphological changes in  
789 mitochondria during hypoxia–reoxygenation stress. *Cell Death Differ.* **18**, 1561–1572 (2011).
- 790 61. Li, J. *et al.* Mitochondrial elongation-mediated glucose metabolism reprogramming is essential for  
791 tumour cell survival during energy stress. *Oncogene* **36**, 4901–4912 (2017).
- 792 62. Combs, J. A. *et al.* Human Cytomegalovirus Alters Host Cell Mitochondrial Function during Acute  
793 Infection. *J. Virol.* **94**, (2020).
- 794 63. Li, Y., Boehning, D. F., Qian, T., Popov, V. L. & Weinman, S. A. Hepatitis C virus core protein  
795 increases mitochondrial ROS production by stimulation of Ca<sup>2+</sup> uniporter activity. *FASEB J.* **21**,  
796 2474–2485 (2007).
- 797 64. Muraro, S. P. *et al.* Respiratory Syncytial Virus induces the classical ROS-dependent NETosis  
798 through PAD-4 and necroptosis pathways activation. *Sci. Rep.* **8**, 14166 (2018).
- 799 65. Lassoued, S. *et al.* Epstein-Barr virus induces an oxidative stress during the early stages of  
800 infection in B lymphocytes, epithelial, and lymphoblastoid cell lines. *Mol. Cell. Biochem.* **313**, 179–  
801 186 (2008).
- 802 66. Tanaka, M., Sata, T. & Kawaguchi, Y. The product of the Herpes simplex virus 1 UL7 gene interacts  
803 with a mitochondrial protein, adenine nucleotide translocator 2. *Virology* **5**, 125 (2008).
- 804 67. Derakhshan, M., Willcocks, M. M., Salako, M. A., Kass, G. E. N. & Carter, M. J. Human herpesvirus  
805 1 protein US3 induces an inhibition of mitochondrial electron transport. *J. Gen. Virol.* **87**, 2155–2159  
806 (2006).
- 807 68. Saffran, H. A., Pare, J. M., Corcoran, J. A., Weller, S. K. & Smiley, J. R. Herpes simplex virus  
808 eliminates host mitochondrial DNA. *EMBO Rep.* **8**, 188–193 (2007).
- 809 69. Chadha, P. *et al.* Domain Interaction Studies of Herpes Simplex Virus 1 Tegument Protein UL16  
810 Reveal Its Interaction with Mitochondria. *J. Virol.* **91**, e01995-16 (2017).

- 811 70. McSharry, B. P., Jones, C. J., Skinner, J. W., Kipling, D. & Wilkinson, G. W. G. Human telomerase  
812 reverse transcriptase-immortalized MRC-5 and HCA2 human fibroblasts are fully permissive for  
813 human cytomegalovirus. *J. Gen. Virol.* **82**, 855–863 (2001).
- 814 71. Albecka, A. *et al.* Dual Function of the pUL7-pUL51 Tegument Protein Complex in Herpes Simplex  
815 Virus 1 Infection. *J. Virol.* **91**, (2017).
- 816 72. Schindelin, J. *et al.* Fiji: an open-source platform for biological-image analysis. *Nat. Methods* **9**,  
817 676–682 (2012).
- 818 73. Kenny, M. & Schoen, I. Violin SuperPlots: visualizing replicate heterogeneity in large data sets.  
819 *Mol. Biol. Cell* **32**, 1333–1334 (2021).
- 820 74. Gómez-Rubio, V. ggplot2 - Elegant Graphics for Data Analysis (2nd Edition). *J. Stat. Softw.* **77**,  
821 (2017).
- 822 75. Racine, J. S. RStudio: A Platform-Independent IDE for R and Sweave: Software Review. *J. Appl.*  
823 *Econom.* **27**, 167–172 (2012).
- 824 76. Lord, S. J., Velle, K. B., Mullins, R. D. & Fritz-Laylin, L. K. SuperPlots: Communicating  
825 reproducibility and variability in cell biology. *J. Cell Biol.* **219**, e202001064 (2020).
- 826 77. Shafaq-Zadah, M., Dransart, E. & Johannes, L. Clathrin-independent endocytosis, retrograde  
827 trafficking, and cell polarity. *Curr. Opin. Cell Biol.* **65**, 112–121 (2020).
- 828
